# Supplementary material
Source: publisher site journal article supplement (https://www.dovepress.com/article/485004)
Supplement: Supplementary file 1 [file get_supplementary_file.php]

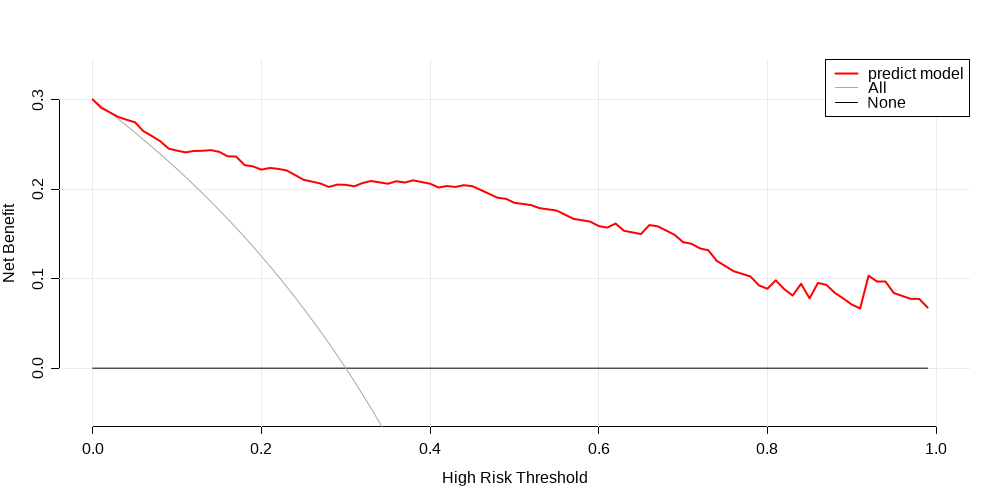


Supplementary Figure 1 Decision curve analysis.

The decision curve analysis revealed that the net benefit from this model was significantly higher than 0, implying its remarkable accuracy and utility for clinical decision-making.


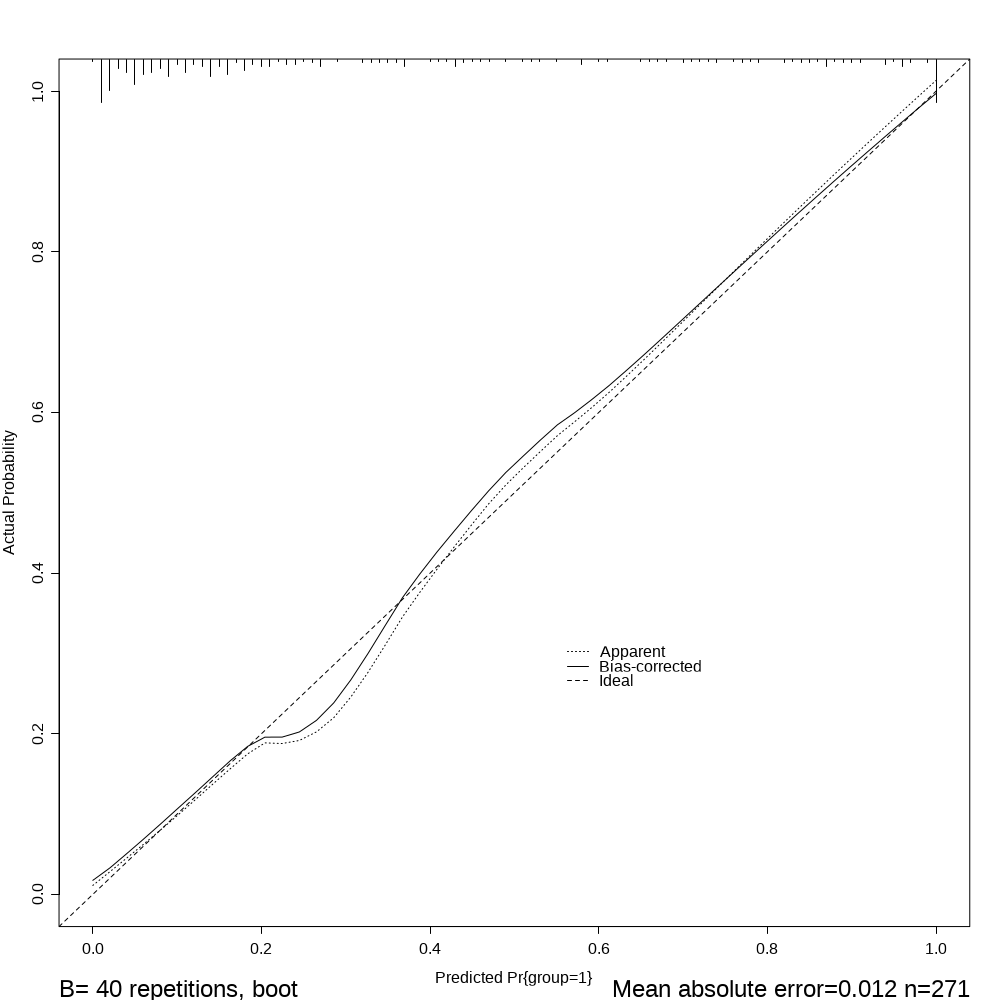


Supplementary Figure 2 Calibration curve

The correction curve indicated that the predict model had a clear correlation between the predicted and actual probability.
